# Supplementary material for: Retrospective study on the clinical outcomes and characteristics of acute myeloid leukemia: different outcomes in the same risk group
Source: PeerJ. 2025 Dec 5;13:e20436. doi: 10.7717/peerj.20436 (PMC12684409; doi:10.7717/peerj.20436)
Supplement: Supplemental Information 2 [file peerj-13-20436-s002.xlsx]

## Sheet: survival
Patient	Sex	Age	Diagnosis (FAB Classification)	transplant	Follow-up cut-off date/date of death	EFS		OS		dead	0 represents death.
P1	male	69	AML M2	No	2022.08.01	481	0	798	0	Yes
P2	male	57	AML M2	No	2022-12-01	37	0	54	0	Yes
P3	male	66	AML M5	No	2023.11.05	149	0	239	0	Yes
P4	male	77	AML M5	No	2022.06.25	80	0	80	0	Yes
P5	female	62	AML M5	No	2022.09.12	345	0	376	0	Yes
P6	male	55	AML M4	No	2024.11.16	914	1	914	1	No
P7	male	48	AML M4	No	2024.11.20	617	1	617	1	No
P8	male	53	AML M2	No	2024.4.3	335	0	662	0	Yes
P9	female	69	AML-M5	No	2024.09.14	889	1	889	1	No
P10	female	77	AML M2	No	2023.11.06	98	0	98	0	Yes
P11	male	15	AML M2a	No	2022.11.11	19	0	19	0	Yes
P12	female	46	AML M2a	No	2024.3.18	943	0	1634	0	Yes
P13	male	44	AML M5	No	2024.11.16	273	0	792	0	Yes
P14	female	41	AML M2	No	2022.03.08	1097	0	1156	0	Yes
P15	female	78	AML M2a	No	2024.8.15	381	0	558	0	Yes
P16	male	58	AML M2a	No	2024.09.03	82	0	82	0	Yes
P17	female	72	M5	No	2024.11.16	207	1	207	1	No
P18	female	64	AML M5	No	2024.8.21	294	0	310	0	Yes
P19	female	58	AML M5	No	2021.06.07	52	0	52	0	Yes
P20	male	61	AML M5	No	2023.07.06	15	0	15	0	Yes
P22	male	74	AML M1	No	2024.11.20	519	1	519	1	No
P23	female	68	AML M5	No	2023.02.09	161	0	182	0	Yes
P24	male	56	AML M5	No	2024.11.16	250	1	250	1	No
P25	male	80	AML-MR	No	2024.01.21	75	0	84	0	Yes
P26	male	75	AML M1	No	2024.4.21	46	0	46	0	Yes
P27	male	58	AML M2	No	2024.11.16	252	1	252	1	No
P28	male	45	AML M2	No	2024.11.16	293	1	293	1	No
P29	female	63	AML M1	No	2024.11.16	527	1	527	1	No
P30	male	69	AML M2a	No	2024.10.03	208	0	300	1	No
P31	female	69	AML M5	No	2023.12.29	80	0	103	0	Yes
P32	female	56	AML M4	No	2024.10.03	175	0	468	1	No
P33	female	69	AML M4	No	2024.04.09	161	0	161	0	Yes
P34	male	66	AML M5	No	2023.12.28	106	0	215	0	Yes
P35	female	73	AML M5	No	2024.05.03	164	0	164	0	Yes
P36	female	72	AML M2	No	2024.11.16	1096	0	1304	1	No
P39	female	49	M2	No	2022.3.22	77	0	77	0	Yes
P40	male	69	M2a	No	2023.12.24	256	0	324	0	Yes
P41	male	59	M2a	No	2022.10.26	260	0	260	0	Yes
P42	female	52	M5	No	2024.07.12	531	0	531	0	Yes
P43	female	53	M5	No	2023.8.16	71	0	71	0	Yes
P45	male	73	M5	No	2024.09.03	273	0	273	0	Yes
P46	male	77	M5	No	2024.06.08	123	0	123	0	Yes
P47	male	16	M2	No	2017-11-01	90	0	90	0	Yes
P48	male	36	M5	No	2024.11.16	1563	1	1563	1	No
P49	male	37	M5	No	2020.4.1	109	0	109	0	Yes
P50	male	37	MPAL	No	2021.05.09	74	0	74	0	Yes
P51	male	45	M2a	No	2019.12.3	787	0	839	0	Yes
P52	male	47	M2	No	2021.10.3	363	0	724	0	Yes
P53	male	49	M2	No	2018-08-01	96	1	96	0	Yes
P54	male	49	M2a	No	2024.11.02	1153	1	1698	1	No
P55	male	50	MPAL	No	2019-04-16	240	0	294	0	Yes
P56	male	52	M2	No	2020.7.7	134	0	260	0	Yes
P57	male	53	M2	No	2021.8.06	296	0	341	0	Yes
P58	male	53	M2b	No	2021.7.30	351	0	410	0	Yes
P59	male	60	M2a	No	2024.11.16	1369	1	1369	1	No
P60	male	64	AML-MR	No	2018-06-26	284	0	284	0	Yes
P61	male	70	M2a	No	2022.6.16	95	0	127	0	Yes
P62	male	70	M5	No	2020.1.30	513	0	537	0	Yes
P63	male	72	M2	No	2022.5.30	108	0	108	0	Yes
P64	male	75	M2a	No	2021.04.20	82	0	141	0	Yes
P65	male	86	M5	No	2021.11.08	14	0	14	0	Yes
P66	female	31	M5	No	2019.10.9	119	0	159	0	Yes
P67	female	34	M5	No	2024.11.20	984	1	984	1	No
P68	female	40	M1	No	2020.9.16	353	0	498	0	Yes
P69	female	43	M2	No	2021.11.4	573	0	608	0	Yes
P70	female	49	M2	No	2024.11.16	1721	1	1721	1	No
P71	female	50	M2	No	2022.8.30	280	0	424	0	Yes
P72	female	55	M2b	No	2020.03.20	341	0	341	0	Yes
P73	female	55	M2a	No	2019-12-25	68	0	89	0	Yes
P74	female	54	M4	No	2022.4.7	248	0	836	0	Yes
P75	female	55	M2	No	2024.11.16	1496	1	1496	1	No
P76	female	63	M2	No	2018-05-27	465	0	651	0	Yes
P78	female	66	M2a	No	2024.11.16	1637	1	1637	1	No
P79	female	66	M2	No	2021.10.22	422	0	687	0	Yes
P80	female	67	M2	No	2024.8.30	1490	1	1490	1	No
P81	female	68	M5	No	2024.11.16	1507	1	1507	1	No
P82	female	42	M5b	No	2019.2.8	303	0	366	0	Yes
P83	female	55	M1	No	2019.04.03	46	0	46	0	Yes
P84	female	58	M2a	No	2018-03-15	57	0	57	0	Yes
P85	male	53	AML M1	HSCT	2024.11.16	619	1	619	1	No
P86	male	45	AML M1	HSCT	2024.11.17	778	1	778	1	No
P87	male	47	AML M2	HSCT	2024.9.07	167	0	500	0	Yes
P88	male	41	AML M5	HSCT	2024-11-16	247	1	247	1	No
P89	female	29	AML M5	HSCT	2024.11.16	541	1	541	1	No
P90	female	48	AML M2	HSCT	2024.11.16	511	1	511	1	No
P91	male	33	M2a	HSCT	2024.11.16	237	0	687	1	No
P92	female	31	M2a	HSCT	2024.8.10	973	0	973	0	Yes
P93	female	38	M2	HSCT	2024.11.20	318	0	1550	1	No
P94	female	46	M5	HSCT	2024.11.16	1074	1	1074	1	No
P95	female	57	M5	HSCT	2024.11.16	481	1	481	1	No
P96	female	34	M6	HSCT	2024.11.20	153	0	1182	1	No
P97	female	57	AML M2	HSCT	2024.11.19	149	0	343	0	Yes
P98	female	38	AML M5	HSCT	2024.10.10	191	1	191	1	No
P99	female	55	AML M5	HSCT	2024.10.10	149	1	149	1	No
P100	female	50	AML M5	HSCT	2024.10.10	171	1	171	1	No
P102	male	24	M5	HSCT	2020.4.3	307	0	307	0	Yes
P103	male	24	M5	HSCT	2022.3.30	1567	1	1567	1	No
P104	male	27	M2	HSCT	2021.03.20	959	1	959	1	No
P105	male	36	M2	HSCT	2019.12.16	384	0	384	0	Yes
P106	male	37	M2a	HSCT	2018-10-02	328	0	328	0	Yes
P107	male	43	M5	HSCT	2024.11.16	1720	1	1720	1	No
P108	male	52	AML M5	HSCT	2024.11.16	759	1	759	1	No
P109	male	52	M5	HSCT	2024.5.19	1143	1	1143	1	No
P110	male	54	M1	HSCT	2019-05-20	249	0	347	0	Yes
P111	male	56	M2a	HSCT	2024.11.16	1520	1	1520	1	No
P112	male	67	M2a	HSCT	2022.4.6	632	0	747	0	Yes
P114	female	17	M5	HSCT	2019.10.24	214	0	214	0	Yes
P115	female	19	M4	HSCT	2024.11.16	271	1	1342	1	No
P116	female	24	M2a	HSCT	2024.11.16	217	1	1587	1	No
P117	female	26	M2a	HSCT	2024.11.16	1269	1	1269	1	No
P118	female	28	M4	HSCT	2024.11.16	1633	1	1633	1	No
P119	female	30	M2a	HSCT	2021.5.20	131	0	349	0	Yes
P120	female	32	M5	HSCT	2020.08.06	528	0	544	0	Yes
P121	female	37	M4	HSCT	2020.3.30	359	0	429	0	Yes
P122	female	43	M2	HSCT	2024.11.16	1438	1	1438	1	No
P123	female	44	M2a	HSCT	2024.11.16	1425	1	1425	1	No
P124	female	45	M5	HSCT	2022.3.30	500	1	500	1	No
P125	female	45	M2a	HSCT	2024.11.16	1580	1	1580	1	No
P126	female	47	M5	HSCT	2024.11.16	1563	1	1563	1	No
P127	female	40	M5	HSCT	2024.11.16	1625	1	1625	1	No
P128	female	47	M2a	HSCT	2024.11.16	294	0	1653	1	No
P129	female	51	M2	HSCT	2024.11.16	1606	1	1606	1	No
P130	female	53	M2	HSCT	2020.08.07	196	0	196	0	Yes
P131	female	52	M5	HSCT	2019.12.31	372	0	372	0	Yes
P132	male	31	AML M5	HSCT	2023.05.3	390	0	454	0	Yes
P133	male	30	AML M5	HSCT	2024.11.20	783	0	878	0	Yes
P134	female	65	AML M1	HSCT	2024.11.16	688	1	688	1	No
P135	male	25	AML M2a	HSCT	2024.11.16	1138	1	1138	1	No
P136	female	38	AML M2	HSCT	2024.11/16	538	1	538	1	No
P137	female	60	AML M1	HSCT	2024.10.02	443	1	443	1	No
P138	female	53	AML M5	HSCT	2024.08.04	477	1	477	1	No
P139	female	48	AML M2	HSCT	2024.11.03	358	0	435	1	No
P140	male	32	M2	HSCT	2024.11.16	973	1	973	1	No
P141	female	36	AML M2a	ASCT	2024.11.17	1145	1	1145	1	No
P142	female	26	AML M2a	ASCT	2024.12.05	1405	1	1405	1	No
P143	female	36	AML M4	ASCT	2024.11.16	817	1	817	1	No
P144	male	46	AML M4	ASCT	2024.11.16	980	1	980	1	No
P145	female	55	AML M5	ASCT	2022.8.09	466	0	496	0	Yes
P146	female	52	AML M5	ASCT	2023.05.18	464	0	520	0	Yes
P147	male	66	M2a	ASCT	2024.11.20	620	0	882	1	No
P148	female	49	M2a	ASCT	2018-10-20	322	0	507	0	Yes
P149	male	29	M2	ASCT	2024.11.16	1452	1	3027	1	No
P150	male	52	M2	ASCT	2021.3.25	214	0	325	0	Yes
P151	female	44	M2	ASCT	2022.1.7	790	0	790	0	Yes
P152	female	42	M2a	ASCT	2024.11.16	1354	1	1354	1	No
P154	female	59	M5	ASCT	2024.11.16	1619	1	1619	1	No

## Sheet: base
Patient	Sex	Age	ID	Diagnosis (FAB Classification)	WBC	HB	PLT	LDH	FAB	Bone marrow primitive cells	Peripheral blood primitive cells	Induction chemotherapy	Gene mutation	Chromosome
P1	female	28	9301032664	M4	22.71	59	5	527.1	3.98	0.695	0.6	IAE	TET2、ASXL1、FLT3	45，X,-X,t（8；21）(q22；q22.1)［20］
P2	male	43	206425656	M5	178.8	109	104	2296.5	4.44	0.935	0.93	IA	TET2；EZH2,FLT3	Normal
P3	female	50	A000436767	M2	7.31	81	33	427.3	3.33	0.488	0.65	DA	KIT，	Normal
P4	female	68	205638052	M5	40.24	81	70	534	3.09	0.46	0.38	HA	DNMT3A;PTPN11,WT1,NPM1	Normal
P5	female	52	206277753	M5	103.09	116	107	1291.3	3.58	0.895	0.93	DAE	PTPN11，DNMT3A；NPM1	Normal
P6	male	52	A001043828	AML M5	3.1	148	225	156.3	4.82	0.25	0	others	IDH1、ARID2	Normal
P7	male	69	A27701	AML M2	1.74	96	113	267.7	5.99	0.555	0.08	AZA+BCL2	IDHl SRSF2 ；NPMl	46,XY,+1,der(1;15)(q10;q10)[7]/46,XY[13]
P8	male	70	205244893	M2	2.07	116	141	228.8	6.35	0.49	0.02	AZA+BCL2	SRSF2，RUNX1,PHF6	Normal
P9	female	72	891266	M5	48.17	104	69	371	5.5	0.805	0.35	AZA+BCL2	DNMT3A、NPM1、FLT3、	Normal
P10	female	49	A000670687	M2	3.36	27	8	496.8	4.25	0.695	0.12	others	FLT3、KIT、JAK2、WT1、U2AF1	46,XX,t(8;21)(q22;q22)[2]/45,idem,-X[18]
P11	female	32	9300835981	M5	44.63	107	65	170.5	2.87	0.94	0.85	DAE	NRAS	46XX，i（7）（q10），t（11，17）（q23；q12-21）
P12	female	64	101811817	AML M5	3.73	121	235	154.5	2.57	0.215	0.13	AZA+BCL2	DNMT3A、ASXL1、NRAS、ARID2	46,XX,der(3)t(3;3)(p13;q21),der(3)inv(3)(p21q26.2)t(3;3)[5]/45,idem,-7[14]/46,XX[1]
P13	male	32	A22509	M2	5.6	65	33	239.6	6.64	0.38	0.22	DA	EZH2、ABL1	45,X,-Y,t(8;21)(q22;q22)[1]/45,XY,t(8;21)(q22;q22),-13[1]/46,XY[1]
P14	female	44	206102362	M2	85.75	73	366	424	7.09	0.695	0.88	IA	IDH1,FLT3	Normal
P15	female	26	206138555	M2	9.67	80	38	201.6	4.85	0.52	0.54	IA	CEBPA	Normal
P16	female	47	206229324	M5	2.25	62	11	202.1	4.51	0.855	0.5	DAE	IDH1； PHF6	47,XX,+8［9］/46，XX［6］
P17	male	36	A000023091	M5	3.9	69	22	1274.6	4.51	0.575	0.14	IA	KIT	45，X,-Y,t（8；21）（q22；q22）[16]/46，XY[2]
P18	male	86	A000592399	M5	51.26	78	26	3658.3	4.51	0.985	0.91	others	KIT	46,XY,t(8;21)(q22;q22)[20]
P19	female	34	9300075771	M6	1.63	58	50	441.7	2.59	0.34	0	DA	FLT3、NPM1、PTPN11、WT1、CSF3R、DNMT3A、DDX41、CALR	Normal
P20	male	75	A000180629	M2	2.96	49	4	355.2	2.89	0.555	0.33	AZA+BCL2	TET2 ,CEBPA	Normal
P21	female	42	A000584434	M2	6.16	89	53	269.3	2.25	0.455	0.11	DA	ASXL2、KDM6A	46,XX,t(8;21)(q22;q22)[20]
P22	female	66	206554981	M2	1.25	121	167	358.4	3.62	0.88	0.81	CAG	CEBPA ；WTl ;FLT3;IDH2，NPMl	Normal
P23	male	57	A001028300	AML M2	8	77	11	280.7	4.25	0.205	0.16	IA	TP53	39～42,XY,der(4)t(4;11)(q21;q22-q23),-5,+6,der(6;19)(p10;p10),+der(6),-7,-9,del
P24	female	24	9300680322	M2	7.25	67	28	767.8	3.3	0.6	0.77	IA	WT1 FLT3 CEBPA,	Normal
P25	male	72	A000725514	M2	1.32	73	64	292.9	3.63	0.35	0	AZA+BCL2	TP53	66～80,XXY,+2,+3,del(3)(p13),der(3;22)(q10;q10),del(5)(q13q33),+del(5)(q13q33),- 6,+8,+8,+9,+add(9)(p12),+10,+11,del(11)(p12),i(11)(q10),+12,-13,i(13)(q10),der (14;22)(q10;q10),add(17)(p12),+21,+22,+22*2,+mar1,+mar2[cp20]
P26	male	56	100327452	M2	1.91	94	94	169.1	4.05	0.745	0	DA	NPM1，CEBPA	Normal
P27	male	66	B87642	AML M5	4.27	59	76	267.3	2.74	0.33	0	AZA+BCL2	FLT3、MPL、JAK3	46,XY,t(11;19)(q23.3;p13.1)[7]
P28	male	77	C02924	AML M5	3.94	74	18	3331.6	3.7	0.45	0.07	AZA+BCL2	TP53、PRPF8	45～46,XY,-5,t(8;11;11)(q23;p15;q12),+r(8)(p23q24),-14,der(14),add(19)(p13),add (20)(q13),der(21),+mar,inc[cp15]/46,XY[5]
P29	male	47	A001199539	AML M2	0.86	47	24	148.6	3.55	0.7	0	DA	TP53、ASXL1、DDX41、IDH1、	Normal
P30	male	33	C55750	M2	24.05	89	21	588.1	4.66	0.865	0.58	IA	CEBPA、NRAS、GATA2、WT1	Normal
P31	male	52	9301022491	M2	34.3	49	19	815.2	2.63	0.805	0.62	IA	DNMT3A；FLT3；NPMI；	Normal
P32	male	49	204598260	M2a	1.9	59	8	157.9	2.31	0.415	0.24	DA	No mutation	Normal
P33	female	58	A001202259	AML M5	2.74	85	192	491.2	7.84	0.725	0.5	others	IDH1、DNMT3A、SETBP1	Normal
P34	female	34	A000765177	M5	11.57	70	16	473.4	3.8	0.92	0.52	DAE	IDH1	t（11；19）（q23.3；p13.1）[20]
P35	male	49	9300680157	M2	1.45	55	146	196.1	5.7	0.475	0.06	DA	IDH2 ASXL1, PHF6	Normal
P36	female	55	206179121	M2	7.66	71	8	331.2	1.58	0.4	0.37	DAE	KIT	46，XX,t（8；21）（q22；q22.1）del（9）（q22）
P37	male	66	A001557882	AML M5	27.06	91	91	244.7	4.49	0.69	0.55	DAE	KRAS、FLT3、NPM1、CEBPA、DNMT3A、TET2	Normal
P38	female	78	205135414	AML-MR	1.8	86	65	184	2.8	0.254	0.02	AZA+BCL2	TP53、DNMT3A、ASXL1、CSNK1A1	46,XX,del(5)(q13q33)[20]/46,XX,del(7)(q22q34)[1]/46,XX[6]
P39	male	66	C32913	M2	28.01	89	12	527.5	4.43	0.8	0.94	AZA+BCL2	CEBPA、JAK3、WT1	Normal
P40	male	69	C60071	M2	3.16	82	6	377.6	4.39	0.46	0.22	others	CEBPA、SRSF2、ASXL1、TET2、STAG2	Normal
P41	male	29	9300342634	M2	8.49	137	22	269.7	3.39	0.69	0.53	DA	No mutation	Normal
P42	female	55	206162036	M1	1.19	85	65	512.1	5.06	0.9	0.45	DAE	IDH2；TP53；	Normal
P43	male	61	A001254426	AML M5	2.39	82	101	193.8	1.36	0.385	0	AZA+BCL2	TP53	46~47,XY,der(5;17)(p10;q10),add(11)(q25),der(11),+19,del(22)(q11.2),+del(22),+mar[cp5]/46,XY[15]
P44	male	65	D22311	AML-MR	10.44	105	12	452.6	4.69	0.825	0.27	IA	ASXL1、RUNX1、TET2、ZRSR2、NRAS、PTPN11、KRAS、EZH2、SBDS、SAMD9L、ABL1	48,XY,+14,der(17)del(17)(p13p12)t(17;18)(q22;q22),der(18)t(17;18),+20 [1]/49,idem,+21[5]/46,XY[14]
P45	male	37	206624357	M5	74.4	58	53	1239.3	2.42	0.6	0.59	DAE	No mutation	Normal
P46	male	60	203391415	M2	6.34	111	28	232.7	4.56	0.46	0.21	DA	No mutation	Normal
P47	female	17	206102755	M5	8.42	81	35	215.9	2.78	0.71	0.1	DAE	No mutation；	46，XX,t（11；19）（q23；p13）
P48	female	57	D17974	AML M2	1.89	82	70	153.6	3.83	0.3	0.06	DA	TP53	Complex karyotype
P49	female	62	B86130	AML M5	233.01	80	19	765.7	1.4	0.945	0.96	AZA+BCL2	KRAS、NRAS	78,XXX,+X,+X,+3,+4,+5,+7,+8,+9,+10,+12,-17,+19,-21 [1]/79,XXX,+1,+2,+3,+3,+4,+5,+14,+15,+19,+21[1]/46,XX[8]
P50	female	44	9301035316	M2	43.37	57	16	524.6	4.52	0.635	0.91	IA	NRAS;CEBPA	Normal
P51	male	74	A001247097	AML M1	4.18	96	10	309.7	3.77	0.455	0.42	AZA+BCL2	CEBPA、TET2	ND
P52	male	55	A000842802	AML M4	191	62	126	203.4	4.62	0.945	0.2	IAE	NPM1、IDH2、	Normal
P53	female	73	A000452454	AML M5	44.73	94	78	650.7	2.97	0.855	0.94	AZA+BCL2	NRAS、SH2B3、IDH2、SRSF2、NPM1、FLT3、SETD2	Normal
P54	female	31	A000644954	M2	29.88	94	40	1452	3.07	0.46	0.88	DA	CEBPA、WT1、GNAS	46,XX,del(9)(q13q22)[1]/46,XX[5]
P55	male	41	994804	AML M5	127.9	62	6	581	4.23	0.76	0.87	IAE	NRAS、FLT3、ARID2、SETD2	46,XY,inv(16)(p13.1q22)[20]
P56	male	53	C66262	AML M1	17.65	56	15	535.8	4.87	0.915	0.78	DA	FLT3、NPM1、WT1、DNMT3A、TET2、EZH2、	Normal
P57	female	53	A001243424	M5	15.1	68	18	903.5	6.46	0.865	0.62	others	FLT3、CSF3R、CBL、ASXL2、KIT、	46,XX,t(8;21)(q22;q22.1)[20]
P58	male	70	200606602	M5	62.57	110	35	772.5	3.48	0.58	0.58	HA	DNMT3A FLT3, NPM1	Normal
P59	male	45	C47761	AML M1	278.42	68	93	196.7	2.83	0.92	0.96	IA	NPM1	Normal
P60	male	24	206062736	M5	33.11	83	21	860.6	5.73	0.905	0.8	DAE	ASXL1 TET2, WT1	Normal
P61	female	38	A001225662	AML M2	2.31	56	44	510	2.64	0.46	0.45	DA	CEBPA、SETD2、GATA2、	Normal
P62	male	52	9301138743	M2	79.36	55	20	2056.1	3.12	0.505	0.68	DA	CSF3R、KIT、TET2、CEBPA	Normal
P63	male	31	A001034067	AML M5	12.42	81	21	524	2.19	0.785	0.83	IAE	FLT3、WT1、GNAS	Normal
P64	female	37	206147071	M4	15.2	90	65	169	2.8	0.49	0.15	IA	DNMT3A	46，XX,add（9）（q34）/46，XX
P65	male	37	A000737634	MPAL	3.65	66	32	706.7	6.64	0.895	0.26	others	ASXL1,PHF6，RUNX1	45,XY,del(9)(q13q22),-11,inc[4]/46,XY[1]
P66	female	40	206273281	M1	135.46	75	84	821	3.53	0.95	0.97	DA	SETBP1 PHF6	Normal
P67	female	68	D31823	AML M5	4.73	51	36	840.5	3.83	0.785	0.43	AZA+BCL2	FLT3、NPM1、SF3B1、CSNK1A1	Normal
P68	male	56	D34250	AML M5	27.59	77	51	301.8	6.86	0.41	0.15	DAE	NRAS、DNMT3A、U2AF1、BCOR、BCORL1、DDX41	Normal
P69	female	49	205546300	M2	6.09	121	17	206.4	4.71	0.48	0.59	DA	TP53 CEBPA	Normal
P70	female	57	A001292368	M5	1.46	119	291	167.3	6.11	0.215	0	IAE	IDH1、ASXL1、NPM1、CBL、TET2	45,X,dic(X;21)(q28;p12)[11]/46,XX[1]
P71	male	80	761488	AML-MR	0.72	48	108	154	5.5	0.24	0	CAG	SF3B1、DNMT3A、RUNX1、BCOR、BCORL1	47,XY,+der(1;19)(q10;p10)[10]/46,XY[10]
P72	female	60	C89747	AML M1	0.62	77	157	188.8	2.45	0.84	0	HA	SH2B3、TET2、NPM1、BCORL1	Normal
P73	male	67	9301094882	M2	1.2	54	22	100.4	2.45	0.35	0	CAG	TP53	47-49，XY,del(5)(q22;q22),add(7)(q11.2),+8,del(9)(q22q34),-13,-16,add(18)(p11.2),+1-3mar,inc[cq19]/46,XY[1]
P74	female	19	A000295158	M4	17.21	54	12	472.2	2.85	0.63	0.66	DA	KRAS，WT1；NRAS；	46，XX,-13，inv（16）（p13q22），+22［2］/47，idem，+8［15］/46，XX［3］
P75	male	59	C12220	M2	1.8	122	100	259.7	3.43	0.68	0.06	others	MPL、SH2B3	45,X,-Y[16]/46,XY[4]
P76	female	72	B67888	AML-MR	172.28	109	62	1231.5	4.24	0.595	0.61	CAG	TET2、ASXL1、SRSF2、NRAS、STAG2	Normal
P77	female	60	D28343	AML M2	2.65	89	106	458	2.5	0.52	0.09	others	FLT3、SF1	46,XX,t(15;17)(q24;q21)[13]/46,XX[1]
P78	female	29	A001230073	AML M5	5.1	56	131	188.5	2.79	0.825	0.45	DAE	IDH2、NPM1、PTPN11	Normal
P79	male	75	D26758	AML M1	0.75	75	82	199.9	8.12	0.77	0.18	AZA+BCL2	FLT3、IDH2、RUNX1、STAG2、PHF6	Normal
P80	female	59	203459898	M5	31.16	61	35	494.7	2.74	0.745	0.35	DAE	No mutation	Normal
P81	female	36	B93635	AML M2	9.92	102	29	248.6	4.61	0.355	0	DA	CEBPA、SH2B3、JAK3、BCORL1	46,XX,del(7)(q32)[1]/46,XX[19]
P82	female	46	A000638813	M5	27.91	45	15	632.4	2.84	0.825	0.9	DAE	FLT3、KIT、NRAS	46,XX,inv(16)(p13.1q22)[1]/47,idem,+22[17]/46,idem,der(12;15)(q10;q10),+22[2]
P83	female	45		M5	19	88	56	509.9	3.67	0.755	0.57	IAE	FLT3-ITD, NPM1,DNMT3A； KRAS；IDH1 NRAS	Normal
P84	female	26	B77315	AML M2	45.32	86	7	946.3	3.85	0.465	0.83	DA	CEBPA、GATA2	Normal
P85	male	58	C69004	AML M2	4.95	97	120	161.8	2.84	0.625	0.49	DA	TP53、PTPN11、KRAS、IDH2、STAG2、PHF6	47,XY,+11[3]
P86	female	43	9300339347	M2	2.25	70	50	191.8	4.9	0.525	0.5	DAE	IDH2 。	46,XX,del(1)(q22)(9)/46,XX
P87	female	36	C43540	AML M4	11.32	125	14	193.5	2.71	0.5	0.17	IAE	CEBPA	Normal
P88	female	51	206801073	M2	1.05	61	22	246.8	2.49	0.83	0.6	IA	PHF6 ,IDH2	46，XX，add（9）（q34）[4]，46,XX[8]
P89	male	66	A001140147	AML-MR	149.8	59	23	1195	3.79	0.46	0.4	AZA+BCL2	FLT3、DNMT3A、TET2、NPM1	Normal
P90	male	45	A001492088	AML M2	4.52	52	17	229	4.69	0.62	0.38	DA	TET2、JAK3、MPL、CBL	45,X,-Y,t(8;21)(q22;q22.1)[11]/46,XY[5]
P91	male	52	A000322047	M5	105.14	112	26	700.5	4.35	0.565	0.82	DAE	NRAS，CEBPA	46，XY，der（7）del（7）（p15）inv（7）（q22q36）[14]/43，XY，add（7）（q36），-17-18，-18，add（22）（q11.2）[1]/46，XY[15]
P92	female	42	9300635559	M5	191.8	89	67	1148.4	2.89	0.655	0.73	DAE	KRAS	46，XX,t(11;17)(q23;q12-21)[20]
P93	male	54	205590289	M1	7.57	103	62	514.9	3.3	0.67	0	DA	ASXL1 WT1,FLT3	Normal
P94	male	73	C81234	M5	6.13	106	31	532.1	3.38	17.5%	0.22	AZA+BCL2	TP53、DNMT3A	43～45,XY,-Y,-4,del(5)(q13q33),add(8)(q24),add(16)(q13),-18,add(21)(q22) [cp16]/44,XY,add(4)(p16),del(5),-21,add(21),-22[4]
P95	female	54	A000546858	M2	2.07	38	38	222.6	2.75	0.305	0.04	others	JAK3、TET2、KDM6A	ND
P96	male	48	C65916	AML M4	142.9	69	32	457.3	3.91	0.705	0.74	DAE	NRAS	Normal
P97	male	53	C33975	AML M2	25.86	132	33	318.6	3.02	0.5055	0.04	DA	ASXL1、KRAS、NF1、NRAS、RUNX1、TET2	Normal
P98	female	55	9301000481	M2	4.74	88	16	378.6	3.13	0.365	0.29	DA	TET2；CEBPA	Normal
P99	female	69	C18987	AML-MR	3.58	64	22	308.2	6.86	0.67	0.38	AZA+BCL2	TP53、	45,XX,der(1)t(1;7)(p32;p12)del(1)(q12),del(3)(q27q29),-5,der(7)t(1;7) (p32;p12),del(13)(q12q22),der(17),add(18)(q22),add(19)(p11)[16]
P100	female	55	A000114839	M2	50.37	60	60	329.6	3.77	0.505	0.54	IA	FLT3 ； IDH2 。	46，XX,t（3；3）（p21；q29）（18）/46，XX（2）
P101	female	63	D17531	AML M5	15.58	109	75	334.6	3.06	0.49	0.33	HA	JAK2、PTPN11、SH2B3	Normal
P102	female	53	A001308556	AML M5	116.14	75	60	1218	4.63	0.855	0.75	DAE	NRAS、SH2B3、KRAS、FLT3、DNMT3A、NPM1	Normal
P103	female	58	205335988	M2	18.65	64	17	229.7	3.79	0.325	0.3	DA	TP53突变	46，XX，del（5）（q13，q31）/44，del（3）（p22），-7，add（12）（p11），del（15）（q22），-19，-22，+mar（17）
P104	male	45	204816347	M2	115.15	135	61	1767	4.59	0.88	0.92	DA	IDH1，NPM1	Normal
P105	female	42	9300325945	M2	4.26	53	90	474.5	3.69	0.32	0.45	DA	No mutation	Normal
P106	male	36	205125500	M2	242.64	85	106	1515.1	7.01	0.76	0.79	DA	FLT3-ITD，NRAS	46，XY,del(9)(q22)[9]/46,XY[11]
P107	female	67	100086609	M2	1.92	83	51	252.9	2.98	0.665	0.1	others	IDH2,ASXL1	Normal
P108	female	53	203562599	M2	3.94	56	53	158.4	4.09	0.265	0.08	DA	P53	（YY）
P109	female	50	D46468	MPAL	56.79	79	46	632.4	5.28	0.775	0.88	DAE	FLT3,NPM1,DNMT3A	46，XX,del（3）（p21p12）[20]
P110	female	63	A001254187	AML M1	7.12	92	36	302.1	2.87	0.67	0.79	DAE	IDH1、PHF6、ARID2、GNAS、TET1	47,XX,+11[8]/46,XX[12]
P111	male	53	A000061495	M2	29.21	104	5	431.7	3.69	0.52	0.84	DA	CEBPA	Normal
P112	female	55	D50783	AML M5	48.36	98	92	413	4.49	0.71	0.06	DAE	FLT3,NPM1,IDH1,DNMT3A	Normal
P113	male	59	B97500	AML M2	4.1	92	29	196.9	3.02	0.37	0.05	DA	NRAS、PTPN11、SETD2	46,XY,t(3;5)(q21;q33)[18]/46,XY[2]
P114	female	49	9300520725	M2	47.88	86	7	1275.2	3.69	0.395	0.52	DA	NRAS，TET2,WT1,TP53,CEBPA，ASXL1	Complex karyotype
P115	female	77	A001091351	AML M2	3.37	63	26	124.9	2.74	0.37	0.03	others	TP53、GNAS、	Normal
P116	male	50	205406783	MPAL	10.24	102	45	4492.1	3.37	0.945	0.52	others	No mutation	46，XY,t（9，22）（q34，q11）［17］/46，XY［3］
P117	female	30	206262424	M2	27.59	66	65	543.3	3.2	0.585	0.71	IAE	FLT3-ITD，RUNX1	Normal
P118	male	15	A001052725	AML M2	48.73	50	9	2893.2	2.11	0.24	0.32	others	CEBPA、WT1、KRAS、CSF3R、STAT3	Normal
P119	female	47	204876274	M2	8.89	111	7	147	3.8	0.585	0.55	DA	RUNX1	Normal
P120	female	46	A91610	AML M2	2.31	74	28	220.1	3.29	0.29	0.11	DA	TET2、TP53、SRSF2	Normal
P121	female	48	100514275	AML M2	1.86	130	109	149.5	3.46	0.255	0	DA	WT1、FLT3、DNMT3A、GATA2、NPM1、BCOR、PTPN11、CALR	Normal
P122	female	48	A001349504	AML M2	2.27	67	42	241.7	3.34	0.385	0.32	IA	FLT3、NRAS、WT1、GATA2、TET2	Normal
P123	male	69	868683	AML M2	3.1	97	76	302.3	4.23	0.705	0.13	AZA+BCL2	CEBPA，KRAS、IDH2	Normal
P124	female	63	204507793	M2	32.88	60	27	1064.3	3.6	0.455	0.63	DA	TET2,ASXL1	Normal
P125	male	44	C31718	AML M5	5.53	144	10	199.3	3.05	0.49	0.57	DAE	CEBPA、GATA2、WT1	Normal
P126	female	41	202555620	AML M2	1.15	72	124	126.2	2.19	0.47	0.06	DA	RUNX1、DNMT3A、NPM1、FLT3、TET2	Normal
P127	female	43	203067653	M2	8.79	67	32	1362.2	6.34	0.775	0.49	others	DNMT3A , NPM1	Normal
P128	male	64	204817308	AML-MR	5.9	51	34	254	3.65	0.355	0.32	others	TP53	42-45，XY，del（5）（q13，q31），add（6）（p25），-7，+8，-12，add（13）（11），der（16）t（12；16）（q13；q24），-22［cp20］
P129	female	54	9300610595	M4	17.45	91	7	400.9	5.97	0.83	0.62	IA	FLT3-IDK;KRAS	47，XX,inv(16)(p13q22)+mara(10)
P130	male	24	205381105	M5	317.53	84	92	5077.9	0.23	0.88	0.91	DA	No mutation	Normal
P131	male	47	206414461	M2	9.92	62	9	306.9	3.97	0.945	0.58	DA	PHF6；JAK2	46，XY,del(7)(q32),t（8；21）(q22；q22.1)［5］
P132	male	46	C16042	AML M4	31	65	29	280.3	4.56	0.46	0.31	DAE	KRAS、FLT3	ND
P133	female	45	A000004024	M2	63.8	85	78	759.2	3.36	0.665	0.71	DA	DNMT3A FLT3 NPMl	Normal
P134	female	66	201714958	M2	1.2	66	27	222.1	2.96	0.59	0.1	CAG	DNMT3A； IDH2	47，XX,+8(8)/46,XX(6)
P135	female	69	D01308	AML M5	68.12	68	7	824.2	2.22	0.75	0.56	AZA+BCL2	FLT3、SF3B1、DNMT3A、RUNX1、BCORL1	Normal
P136	female	55	C11608	AML M5	115.05	93	57	359.5	3.25	0.92	0.85	DAE	DNMT3A，NPM1,PTPN11，IDH1,JAK3,SETBP1	Normal
P137	female	52	A000584027	M5	115.18	126	71	1407.6	3.96	0.89	0.84	DAE	FLT3、DNMT3A、NPM1、	Normal
P138	male	30	A57837	AML M5	83.61	80	29	582.7	2.63	0.5	0.34	DAE	ASXL1,TET2	Normal
P139	female	52	A000633276	AML M5	17.94	78	14	2162.8	5.59	0.885	0.68	DAE	FLT3、KIT	45,X,-X,t(8;21)(q22;q22)[20]
P140	female	78	C59552	AML M2	3.19	31	163	337.1	2.76	0.28	0	AZA+BCL2	ASXL1、SF3B1、NF1、DNMT3A、RUNX1、GATA2	46,XX,t(3;3)(q21.3;q26.2)[7]/46,XX[3]
P141	female	38	D42372	AML M5	8.65	71	28	352	3.79	0.635	0.61	DAE	KIT,PHF6,SF3B1,GATA2	46，XX,t（8，21）（q22；q22.1）[20]
P142	female	65	B50889	AML M1	2.11	96	138	183	2.29	0.9	0	HA	IDH1、TP53、DNMT3A	Normal
P143	female	40	206084623	M5	2.95	61	70	193.7	4.44	0.695	0.37	DAE	NPM1,FLT3-TKD；CSF3R	45，XX,der（14，18）（q10；q10）［12］/46，XX［8］
P144	female	56	204020408	AML M4	15.17	65	25	453.4	3.5	0.735	0.31	DA	DNMT3A、KIT、NF1	46,XX,add(7)(q31)[4]/46,XX[16]
P145	male	27	9300734160	M2	266.11	80	37	1167.1	7.89	0.795	0.79	HA	IDH2, NPM1	Normal
P146	male	16	202833646	M2	0.95	62	12	542	3.5	0.33	0	others	KIT、WT1、TP53、ASXL1	45，X，-Y，der（3）t（3，21）（q24；q22）t（8；21）（q22；q22），der（8）t（8；21），der（21）t（8；21）t（3；21）［7］/46，XY［1］
P147	female	38	A000054407	M2	88.86	65	8	1220.9	3.58	0.57	0.62	HA	CEBPA、ASXL1、WT1	Normal
P148	male	37	205695382	M2	23.57	50	28	672.1	3.79	0.475	0.91	DA	CEBPA	XY，t（1，22）
P149	male	58	450380	AML M2	1.94	55	23	207	3.42	0.46	0	DA	DDX41、TP53、BCOR	46~49,XY,del(5)(q13q33),r(6),+r(6),+8,+9,add(12)(p13),der(12)add(12)(p13)del(12) (p12p11.2),del(20)(q11.2q13.3)[cp9]/46,XY[5]
P150	male	25	B94344	AML M2	4.9	105	131	159.2	4.39	0.76	0.86	DA	BCORL1、BCOR、	Normal
P151	male	53	9301162660	M2	34.69	77	13	818	3.77	0.45	0.44	DA	RUNXl，WTl,KIT ,DNMT3A	46,XY,t(8;21)(q22;q22)[20]
P152	female	69	A001410220	AML M4	112.22	86	14	668.7	2.93	0.24	0.05	AZA+BCL2	SRSF2、SF3B1、DNMT3A、ASXL2、RUNX1、PTPN11、FLT3、ASXL1	Normal
P153	male	77	A001230990	M5	0.98	99	49	313.9	3.74	0.495	0	AZA+BCL2	NF1、SRSF2、SF3B1、RUNX1、STAG2、ETV6、SF1	46,XY,add(19)(q13)[8]/46,XY[5]
P154	female	31	206032988	M5	1.69	54	78	247.1	1.98	0.34	0	DA	CSF3R, ASXL1, U2AF1	46XX,inv（9)(p12q13)
